# Supplementary material for: Lipophilic molecular rotor to assess the viscosity of oil core in nano-emulsion droplets
Source: Royal Society of Chemistry journal article supplement (doi:10.1039/d4sm01234h), 2025-01-01
Supplement: d4sm01234h1.pdf [file d4sm01234h1.pdf]

SUPPLEMENTARY INFORMATION

---

Lipophilic molecular rotor to assess the viscosity of oil core in nano-emulsion droplets

Mohamed Elhassan,<sup>a,b</sup> Carla Faivre,<sup>a,c</sup> Halina Anton,<sup>d</sup> Guillaume Conzatti,<sup>a</sup> Pascal Didier,<sup>d</sup> Thierry Vandamme,<sup>a</sup> Alteyeb S. Elamin,<sup>c</sup> Mayeul Collot,<sup>c,\*</sup> Nicolas Anton<sup>a,\*</sup>

<sup>a</sup> INSERM (French National Institute of Health and Medical Research), UMR 1260, Regenerative Nanomedicine (RNM), FMTS, Université de Strasbourg, F-67000 Strasbourg, France.

<sup>b</sup> Department of Pharmaceutics, Faculty of Pharmacy, University of Gezira, Wad Medani 21111, Sudan.

<sup>c</sup> Chemistry of Photoresponsive Systems, Laboratoire de Chémo-Biologie Synthétique et Thérapeutique (CBST) UMR 7199, CNRS, Université de Strasbourg, F-67400 Illkirch, France<sup>d</sup> Laboratory of Biophotonic and Pathologies, CNRS UMR 7021, Université de Strasbourg, Faculté de Pharmacie, 74, Route du Rhin, 67401 Illkirch, France.

<sup>e</sup> Omdurman Islamic University, faculty of pharmacy, department of pharmaceutics, Khartoum 00249, Sudan.

To whom correspondence should be addressed: Nicolas Anton ([nanton@unistra.fr](mailto:nanton@unistra.fr)) and Mayeul Collot ([mayeul.collot@unistra.fr](mailto:mayeul.collot@unistra.fr))

## 1. Synthesis of BODIPY rotor acid:

BODIPY rotor acid was synthesized according to previous report [1]

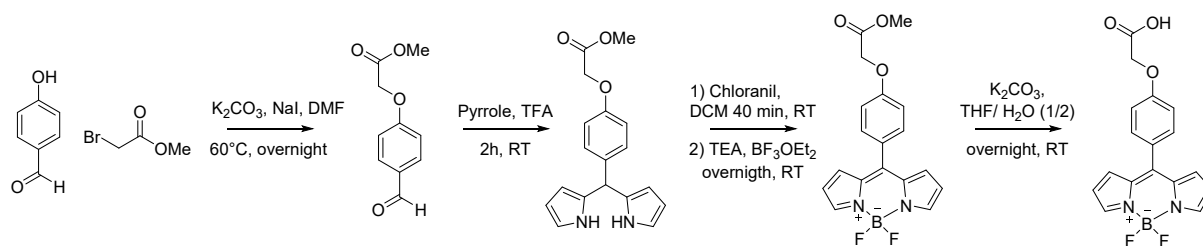

[1] Ashokkumar, P.; Ashoka, A. H.; Collot, M.; Das, A. A fluorogenic BODIPY molecular rotor as an apoptosis marker, *Chem. Commun.*, **2019**, 55, 6902-6905.

$^1\text{H}$  NMR (400 MHz,  $\text{CD}_3\text{OD}-\text{CDCl}_3$  1:1)  $\delta$  7.82 (s, 2H, H pyrrole), 7.43 (d,  $J = 8.8$  Hz, 2H, H phenyl), 7.01 (d,  $J = 8.7$  Hz, 2H, H phenyl), 6.87 (d,  $J = 4.2$  Hz, 2H, H pyrrole), 6.48 (dd,  $J = 4.3, 2.0$  Hz, 2H, H pyrrole), 4.66 (s, 2H,  $\text{CH}_2$ ).

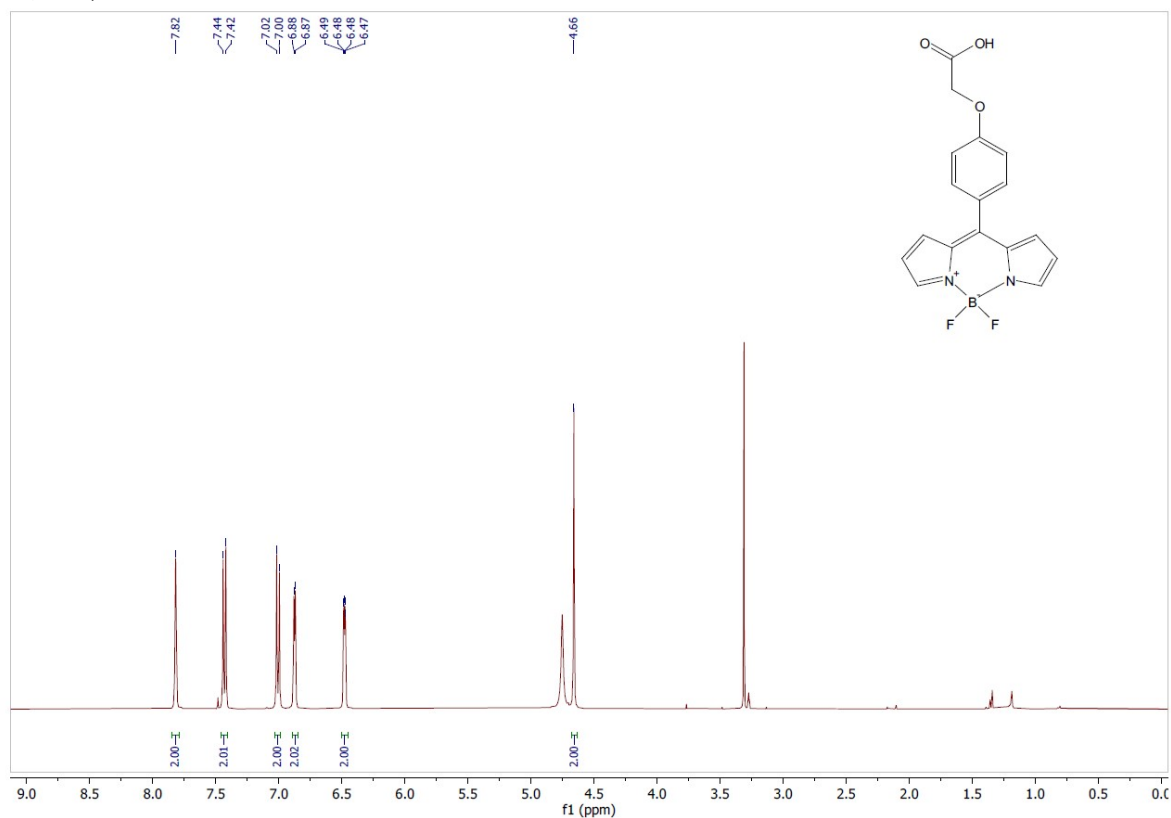

## 2. Synthesis of BODIPY rotor tocopherol:

To the solution of bodipy-acid (173 mg, 0.5 mmol, 1 equiv.) dissolved in dry DCM (5 mL) was added (R)-2,5,7,8-tetramethyl-2-((4R,8R)-4,8,12-trimethyltridecyl)chroman-6-ol (322 mg, 0.75 mmol, 1.5 equiv.), DCC (124 mg, 0.6 mmol, 1.2 equiv.) and DMAP (12 mg, 0.1 mmol, 0.2 equiv.). The reaction mixture was stirred at room temperature overnight. The mixture was diluted with DCM and washed with water and brine, dried over MgSO<sub>4</sub>, filtered, and the solvent was removed in vacuo. The residue was purified by flash column chromatography (Heptane/40-50% DCM) to give Bodipy-rotor-tocopherol as a red oil (100 mg, 0.1 mmol, 26 %).

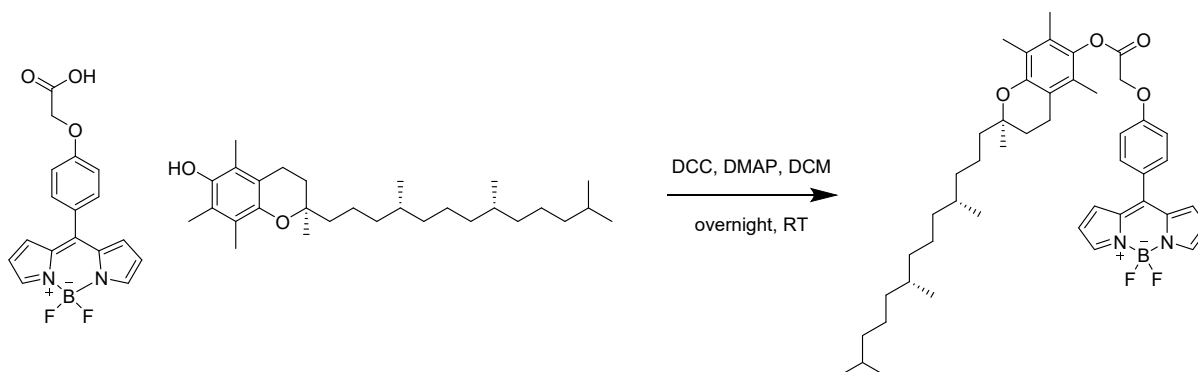

**HRMS (ESI<sup>+</sup>):** m/z calculated for C<sub>46</sub>H<sub>61</sub>BF<sub>2</sub>N<sub>2</sub>O<sub>4</sub> M: 753.4729, found M+H: 755.4749, M+NA: 777.4569, M+K: 793.4301

**<sup>1</sup>H NMR (400 MHz, CDCl<sub>3</sub>)** δ 7.94 (s, 2H, H pyrrole), 7.58 (d, J = 8.7 Hz, 2H, H Phenyl), 7.16 (d, J = 8.8 Hz, 2H, H Phenyl), 6.96 (d, J = 4.2 Hz, 2H, H pyrrole), 6.56 (dd, J = 4.2, 1.9 Hz, 2H, H pyrrole), 5.04 (s, 2H, CH<sub>2</sub>), 2.60 (t, J = 6.8 Hz, 2H, CH<sub>2</sub> Oxane), 2.10 (s, 3H, CH<sub>3</sub> Benzyl), 2.02 (d, J = 18.0 Hz, 6H, CH<sub>3</sub> Benzyl), 1.85 – 1.74 (m, 2H, CH<sub>2</sub> Oxane), 1.60 – 1.47 (m, 4H), 1.45 – 1.35 (m, 4H, CH and CH<sub>2</sub> aliphatic), 1.24 (m, 10H, CH<sub>3</sub>-Oxane and CH<sub>2</sub> aliphatic), 1.16 – 1.05 (m, 6H, CH<sub>2</sub> aliphatic), 0.89 – 0.83 (m, 12H, CH<sub>3</sub> aliphatic).

**<sup>13</sup>C NMR (126 MHz, CDCl<sub>3</sub>)** δ 167.08 (C=O), 160.16, 149.83 (C-O), 146.92 (C-N), 143.74 (C=C-O), 139.89, 134.85, 132.39, 131.37, 127.49, 126.43, 124.74, 123.39, 118.48, 118.45, 118.42, 117.67, 114.86 (C=C), 75.25 (Cq), 65.15 (CH<sub>2</sub>), 49.11, 39.4, 37.56, 37.47, 37.42, 37.38, 37.31, 32.81, 32.80, 32.73, 32.71, 31.03, 28.00, 24.98, 24.47, 22.75, 22.66, 21.05, 20.63, (CH et CH<sub>2</sub> aliphatic) 19.77, 19.67, 19.64 (CH<sub>3</sub> aliphatic), 13.06, 12.21, 11.88 (CH<sub>3</sub>-Benzyl).

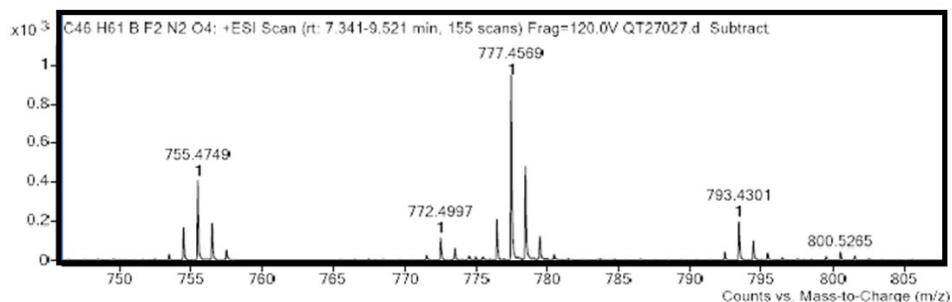



### 3. Spectral characterization of BODIPY rotor tocopherol

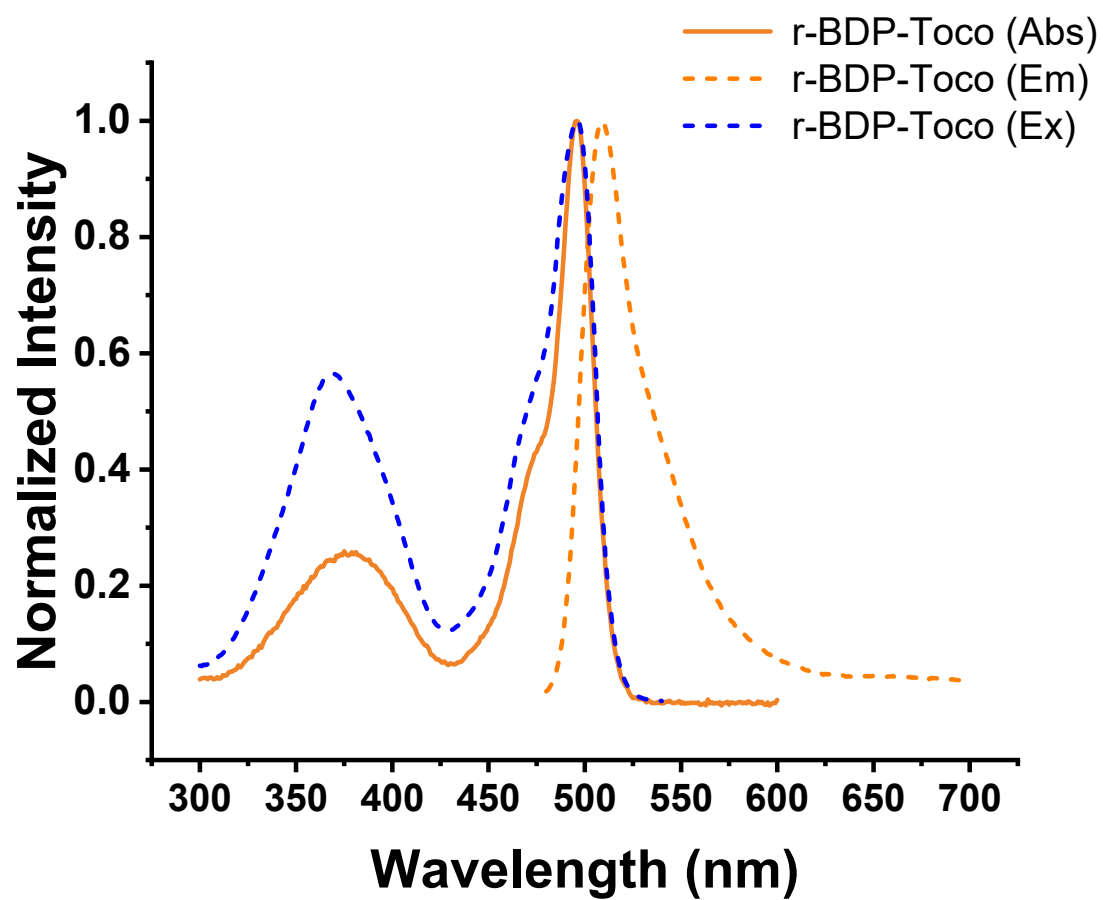

#### 4. Chemical formulas of excipients used in the nano-emulsion formulations

Oil phases are composed of:

- MCT (*Labrafac*<sup>®</sup> WL 1349)

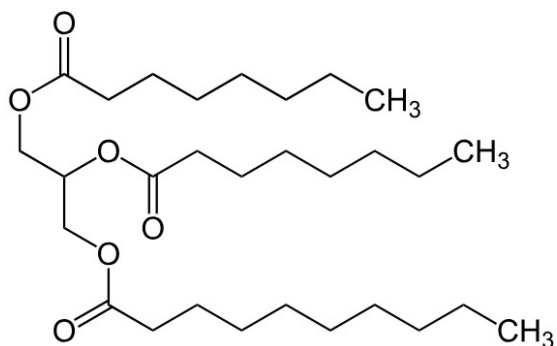

- Castor oil

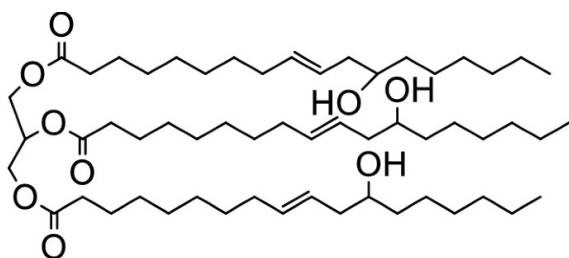

- Vitamin E acetate

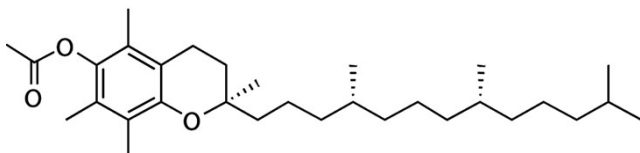

Surfactant:

- *Kolliphor*<sup>®</sup> ELP

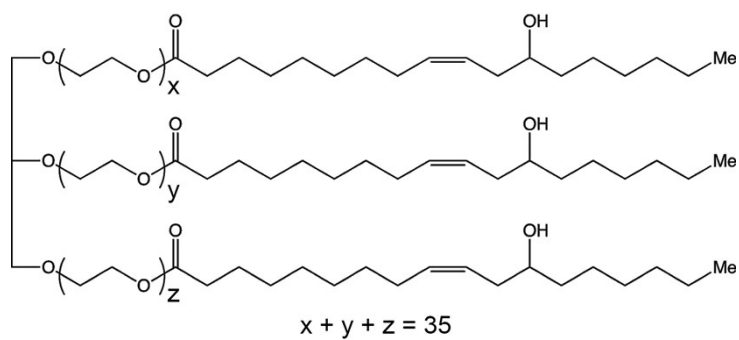

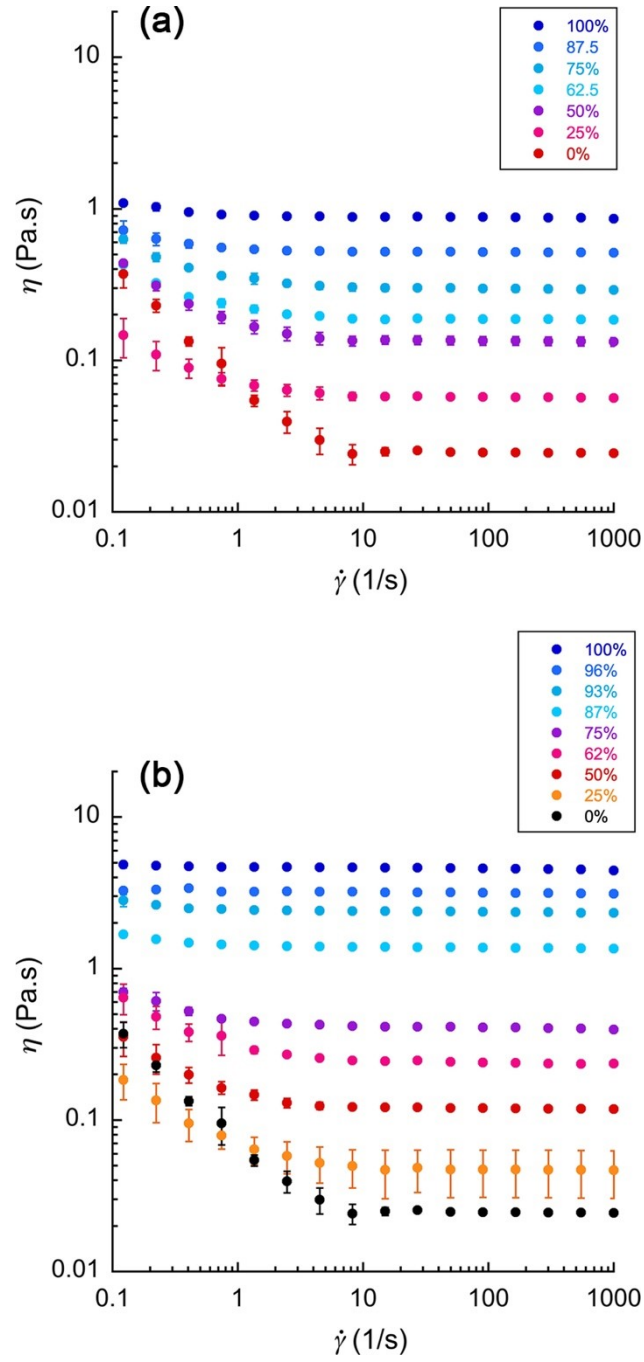

**Figure S1:** Dynamic viscosity ( $\eta$ ) as a function of shear rate ( $\dot{\gamma}$ ) obtained using an rotational rheometer, for different percentage of (a) castor oil, and (b) VEA, mixed with MCT.

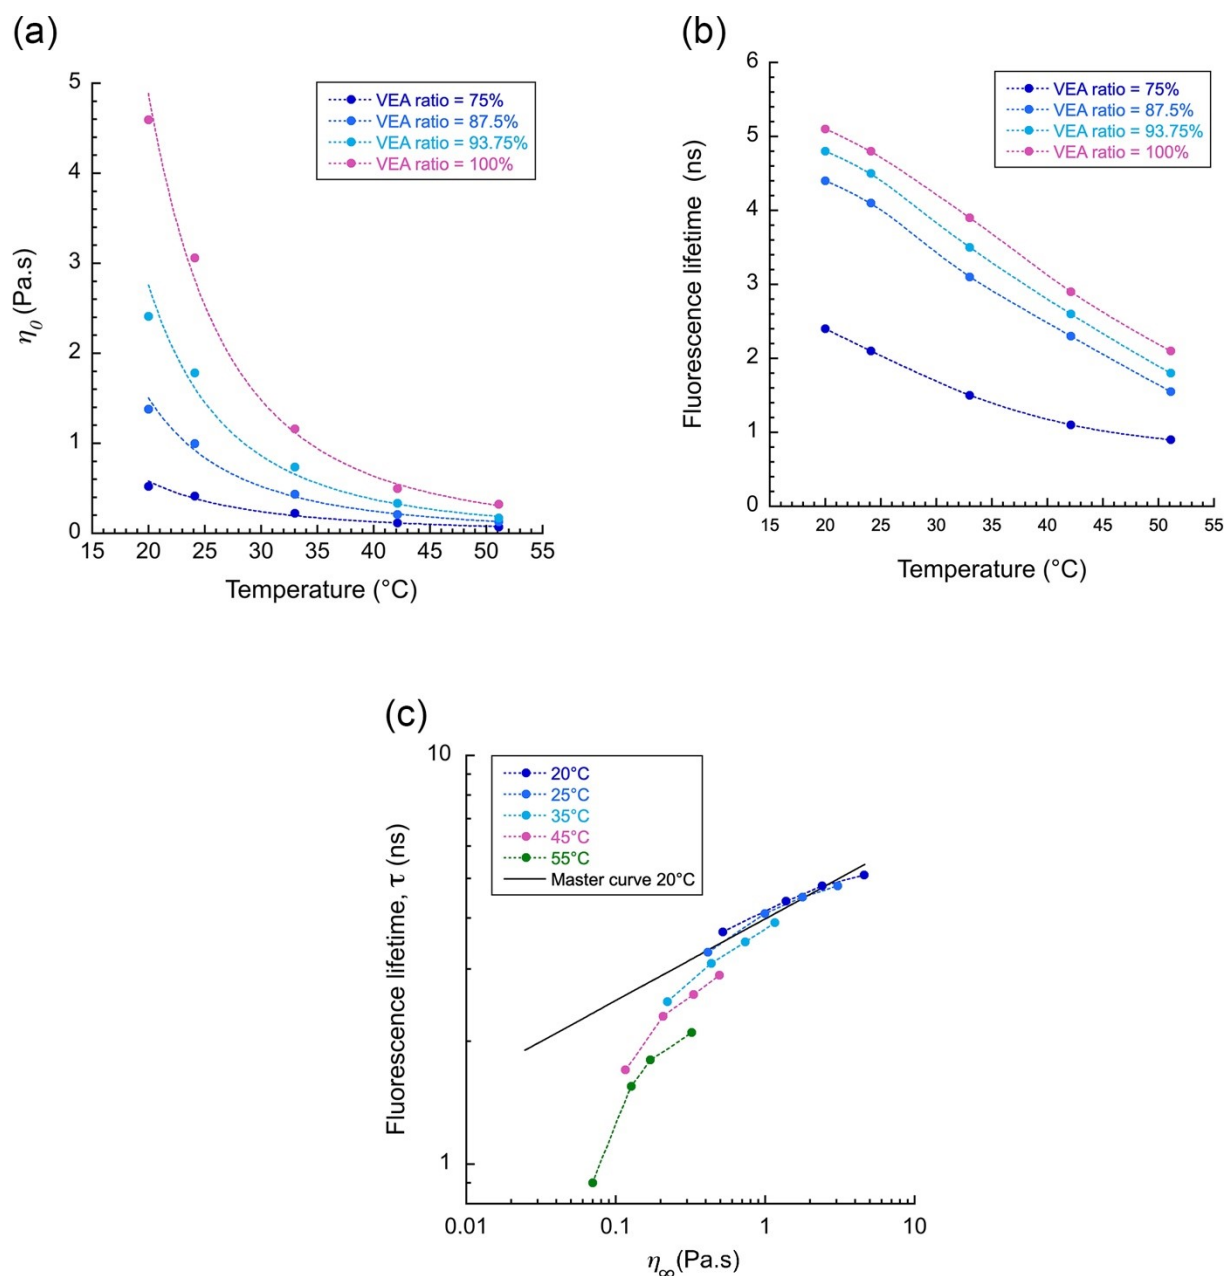

**Figure S2:** Study of the effect of temperature on rBDP-Toco molecular rotors, for VEA / MCT mixtures. (a) impact on viscosity, (b) impact on FLT, and (c) combination representing the relationship between viscosity and FLT and compared to the master curve at 20°C from Fig. 3.

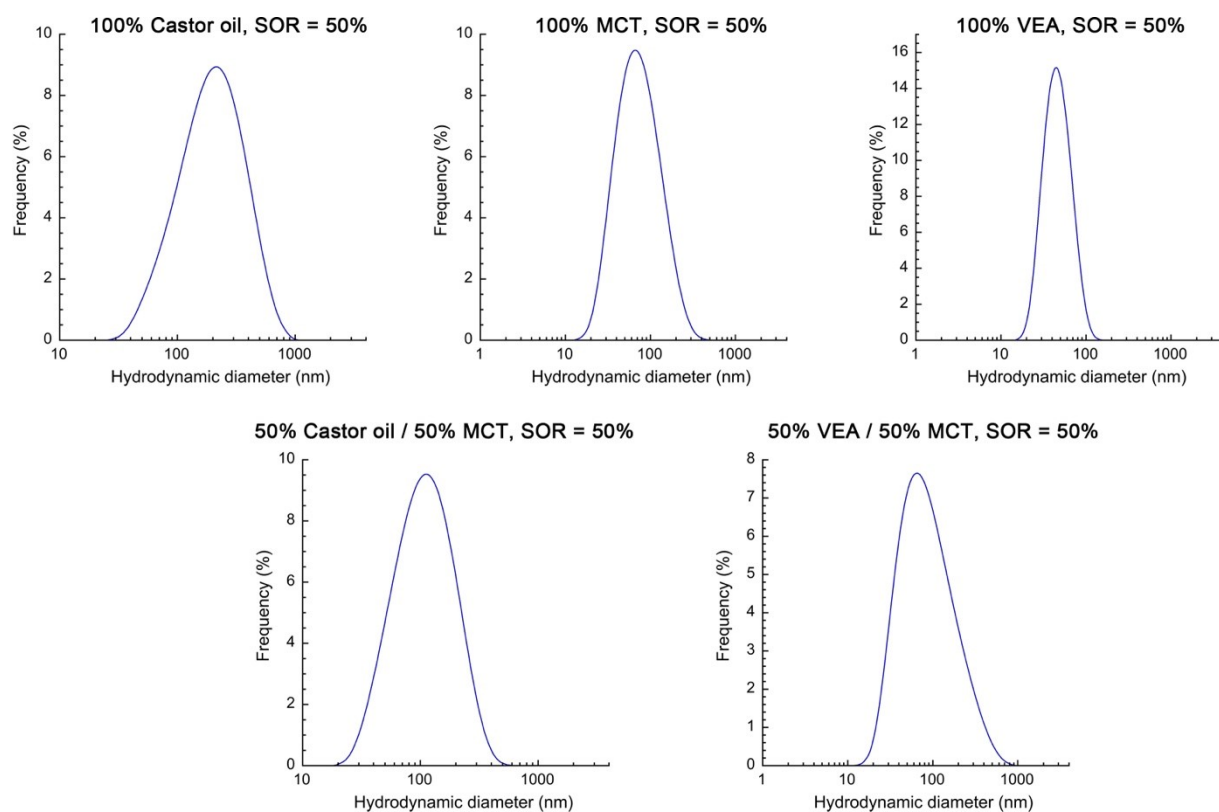

**Figure S3:** Size distribution of nano-emulsions obtained by DLS, for a panel of representative formulations.
